# Supplementary material
Source: Research Square preprint supplement (doi:10.21203/rs.3.rs-9493856/v1)
Supplement: Supplementary file 1 [file 59556799dd05dfaa3a15c85e.docx]

**A comprehensive GC-MS profiling of *Alhagi maurorum with* in vitro anti-diabetic activity: An experimental and theoretical insight in the structural diversity and potential binding affinity**

Aniqa Moveed1, Shagufta Parveen1*, Nusrat Shafiq1*, Maryam Rashid1

1Synthetic and Natural Product Drug Discovery Laboratory, Department of Chemistry, Government College Women University Faisalabad-38000, Pakistan

***Correspondance:** [dr.nusratshafiq@gcwuf.edu.pk](mailto:dr.nusratshafiq@gcwuf.edu.pk) (NS) ; [shagufta_organic@yahoo.com](mailto:shagufta_organic@yahoo.com)

Table S1: ANOVA swift table with significance p-values and %age total variation

| **Variation Source** | **SS** | **DF** | **MS** | **F (DFN, DFd)** | **P value** | **Significance** | **%age of total variation** |
| --- | --- | --- | --- | --- | --- | --- | --- |
| Interaction | 66 | 4 | 16.5 | F (4, 10) = 33.00 | P<0.0001 | 66 | 0.4569 |
| Row Factor | 14129 | 4 | 3532 | F (4, 10) = 7065 | P<0.0001 | 14129 | 97.81 |
| Column Factor | 245 | 1 | 245 | F (1, 10) = 490.0 | P<0.0001 | 245 | 1.696 |
| Residual | 5 | 10 | 0.5 | ----- | -------- | -------- | -------- |

Table S2: Row vs. row comparison in Bonferroni’s correction with p-value and significance

| **Comparison** | **Mean Diff.** | **95.00% CI of diff.** | **Below threshold?** | **Summary** | **Adjusted P Value** |
| --- | --- | --- | --- | --- | --- |
| Row 1 vs. Row 2 | -16.5 | -18.29 to -14.71 | Yes | **** | <0.0001 |
| Row 1 vs. Row 3 | -39.5 | -41.29 to -37.71 | Yes | **** | <0.0001 |
| Row 1 vs. Row 4 | -62.5 | -64.29 to -60.71 | Yes | **** | <0.0001 |
| Row 1 vs. Row 5 | -70 | -71.79 to -68.21 | Yes | **** | <0.0001 |
| Row 2 vs. Row 3 | -23 | -24.79 to -21.21 | Yes | **** | <0.0001 |
| Row 2 vs. Row 4 | -46 | -47.79 to -44.21 | Yes | **** | <0.0001 |
| Row 2 vs. Row 5 | -53.5 | -55.29 to -51.71 | Yes | **** | <0.0001 |
| Row 3 vs. Row 4 | -23 | -24.79 to -21.21 | Yes | **** | <0.0001 |
| Row 3 vs. Row 5 | -30.5 | -32.29 to -28.71 | Yes | **** | <0.0001 |

Table S3: Row vs. row comparison in Bonferroni’s correction with mean values and t-test

| **Comparisons** | **Mean 1** | **Mean 2** | **Mean Diff.** | **SE of diff.** | **N1** | **N2** | **t** | **DF** |
| --- | --- | --- | --- | --- | --- | --- | --- | --- |
| Row 1 vs. Row 2 | 26.5 | 43 | -16.5 | 0.5 | 4 | 4 | 33 | 10 |
| Row 1 vs. Row 3 | 26.5 | 66 | -39.5 | 0.5 | 4 | 4 | 79 | 10 |
| Row 1 vs. Row 4 | 26.5 | 89 | -62.5 | 0.5 | 4 | 4 | 125 | 10 |
| Row 1 vs. Row 5 | 26.5 | 96.5 | -70 | 0.5 | 4 | 4 | 140 | 10 |
| Row 2 vs. Row 3 | 43 | 66 | -23 | 0.5 | 4 | 4 | 46 | 10 |
| Row 2 vs. Row 4 | 43 | 89 | -46 | 0.5 | 4 | 4 | 92 | 10 |
| Row 2 vs. Row 5 | 43 | 96.5 | -53.5 | 0.5 | 4 | 4 | 107 | 10 |
| Row 3 vs. Row 4 | 66 | 89 | -23 | 0.5 | 4 | 4 | 46 | 10 |
| Row 3 vs. Row 5 | 66 | 96.5 | -30.5 | 0.5 | 4 | 4 | 61 | 10 |
| Row 4 vs. Row 5 | 89 | 96.5 | -7.5 | 0.5 | 4 | 4 | 15 | 10 |

Table S4: Row vs. row comparison in Turkey’s test with p-value and significance

| **Comparison** | **Mean Diff.** | **95.00% CI of diff.** | **Below threshold?** | **Summary** | **Adjusted P Value** |
| --- | --- | --- | --- | --- | --- |
| Row 1 vs. Row 2 | -16.5 | -18.15 to -14.85 | Yes | **** | <0.0001 |
| Row 1 vs. Row 3 | -39.5 | -41.15 to -37.85 | Yes | **** | <0.0001 |
| Row 1 vs. Row 4 | -62.5 | -64.15 to -60.85 | Yes | **** | <0.0001 |
| Row 1 vs. Row 5 | -70 | -71.65 to -68.35 | Yes | **** | <0.0001 |
| Row 2 vs. Row 3 | -23 | -24.65 to -21.35 | Yes | **** | <0.0001 |
| Row 2 vs. Row 4 | -46 | -47.65 to -44.35 | Yes | **** | <0.0001 |
| Row 2 vs. Row 5 | -53.5 | -55.15 to -51.85 | Yes | **** | <0.0001 |
| Row 3 vs. Row 4 | -23 | -24.65 to -21.35 | Yes | **** | <0.0001 |
| Row 3 vs. Row 5 | -30.5 | -32.15 to -28.85 | Yes | **** | <0.0001 |

Table S5: Row vs. row comparison in Bonferroni’s correction with mean values and q-test

| **Comparisons** | **Mean 1** | **Mean 2** | **Mean Diff.** | **SE of diff.** | **N1** | **N2** | **Q** | **DF** |
| --- | --- | --- | --- | --- | --- | --- | --- | --- |
| Row 1 vs. Row 2 | 26.5 | 43 | -16.5 | 0.5 | 4 | 4 | 46.67 | 10 |
| Row 1 vs. Row 3 | 26.5 | 66 | -39.5 | 0.5 | 4 | 4 | 111.7 | 10 |
| Row 1 vs. Row 4 | 26.5 | 89 | -62.5 | 0.5 | 4 | 4 | 176.8 | 10 |
| Row 1 vs. Row 5 | 26.5 | 96.5 | -70 | 0.5 | 4 | 4 | 198 | 10 |
| Row 2 vs. Row 3 | 43 | 66 | -23 | 0.5 | 4 | 4 | 65.05 | 10 |
| Row 2 vs. Row 4 | 43 | 89 | -46 | 0.5 | 4 | 4 | 130.1 | 10 |
| Row 2 vs. Row 5 | 43 | 96.5 | -53.5 | 0.5 | 4 | 4 | 151.3 | 10 |
| Row 3 vs. Row 4 | 66 | 89 | -23 | 0.5 | 4 | 4 | 65.05 | 10 |
| Row 3 vs. Row 5 | 66 | 96.5 | -30.5 | 0.5 | 4 | 4 | 86.27 | 10 |
| Row 4 vs. Row 5 | 89 | 96.5 | -7.5 | 0.5 | 4 | 4 | 21.21 | 10 |

*Table S6: Mullikan charges analysis of targeted compounds*

| **Sr.no** | | | **Atoms** | | | **Mulliken charges** | | **Natural population charges** | **Mulliken charges with summed hydrogen** | |
| --- | --- | --- | --- | --- | --- | --- | --- | --- | --- | --- |
| ***2-ethyl-oxetane*** | | | | | | | | | | |
| 1 | | | O | | | -0.466019 | | -0.58686 | -0.466019 | |
| 2 | | | C | | | 0.08513 | | 0.13943 | 0.251321 | |
| 3 | | | C | | | -0.47751 | | -0.4338 | -0.11538 | |
| 4 | | | C | | | -0.02853 | | -0.02462 | 0.300797 | |
| 5 | | | C | | | -0.33188 | | -0.39532 | 0.018763 | |
| 6 | | | C | | | -0.51289 | | -0.57878 | 0.010519 | |
| 7 | | | H | | | 0.166191 | | 0.16717 |  | |
| 8 | | | H | | | 0.180074 | | 0.197 |  | |
| 9 | | | H | | | 0.182056 | | 0.20461 |  | |
| 10 | | | H | | | 0.167659 | | 0.16637 |  | |
| 11 | | | H | | | 0.161666 | | 0.16655 |  | |
| 12 | | | H | | | 0.178062 | | 0.19746 |  | |
| 13 | | | H | | | 0.172581 | | 0.18927 |  | |
| 14 | | | H | | | 0.167493 | | 0.19816 |  | |
| 15 | | | H | | | 0.17059 | | 0.19243 |  | |
| 16 | | | H | | | 0.185321 | | 0.20092 |  | |
| ***Cyclopentane methyl*** | | | | | | | | | | |
| **Sr.no** | | | **Atoms** | | | **Mulliken charges** | | **Natural population charges** | **Mulliken charges with summed hydrogen** | |
| 1 | | | C | | | -0.232856 | | -0.20785 | -0.071426 | |
| 2 | | | C | | | -0.33864 | | -0.3926 | 0.019982 | |
| 3 | | | C | | | -0.35617 | | -0.3849 | 0.005237 | |
| 4 | | | C | | | -0.34555 | | -0.38886 | -0.00431 | |
| 5 | | | C | | | -0.33258 | | -0.39813 | 0.019722 | |
| 6 | | | C | | | -0.49002 | | -0.5722 | 0.030795 | |
| 7 | | | H | | | 0.16143 | | 0.19813 |  | |
| 8 | | | H | | | 0.180905 | | 0.19577 |  | |
| 9 | | | H | | | 0.177717 | | 0.19722 |  | |
| 10 | | | H | | | 0.186477 | | 0.19191 |  | |
| 11 | | | H | | | 0.174926 | | 0.19904 |  | |
| 12 | | | H | | | 0.178497 | | 0.19327 |  | |
| 13 | | | H | | | 0.162746 | | 0.19276 |  | |
| 14 | | | H | | | 0.170341 | | 0.19941 |  | |
| 15 | | | H | | | 0.18196 | | 0.19575 |  | |
| 16 | | | H | | | 0.177647 | | 0.19869 |  | |
| 17 | | | H | | | 0.168188 | | 0.19627 |  | |
| 18 | | | H | | | 0.174977 | | 0.18633 |  | |
| ***Cyclohexane*** | | | | | | | | | | |
| **Sr.no** | | **Atoms** | | | **Mulliken charges** | | **Natural population charges** | | **Mulliken charges with summed hydrogen** |
| 1 | | C | | | -0.364666 | | -0.38886 | | -0.010719 |
| 2 | | C | | | -0.31528 | | -0.37998 | | 0.026228 |
| 3 | | C | | | -0.34234 | | -0.36955 | | -0.0141 |
| 4 | | C | | | -0.36054 | | -0.37327 | | -0.02844 |
| 5 | | C | | | -0.3198 | | -0.38105 | | 0.017514 |
| 6 | | C | | | -0.34653 | | -0.38644 | | 0.009516 |
| 7 | | H | | | 0.189159 | | 0.19683 | |  |
| 8 | | H | | | 0.164789 | | 0.18739 | |  |
| 9 | | H | | | 0.170085 | | 0.18323 | |  |
| 10 | | H | | | 0.171427 | | 0.2025 | |  |
| 11 | | H | | | 0.162923 | | 0.1961 | |  |
| 12 | | H | | | 0.165318 | | 0.17176 | |  |
| 13 | | H | | | 0.170984 | | 0.16914 | |  |
| 14 | | H | | | 0.161108 | | 0.1952 | |  |
| 15 | | H | | | 0.167554 | | 0.20206 | |  |
| 16 | | H | | | 0.169761 | | 0.18712 | |  |
| 17 | | H | | | 0.176161 | | 0.18788 | |  |
| 18 | | H | | | 0.179887 | | 0.19995 | |  |
| ***2-methyl-pentane*** | | | | | | | | | |
| **Sr.no** | | **Atoms** | | | | **Mulliken charges** | | **Natural population charges** | | **Mulliken charges with summed hydrogen** |
| 1 | | C | | | -0.49255 | | | -0.57652 | | 0.011651 |
| 2 | | C | | | -0.23302 | | | -0.1876 | | -0.04818 |
| 3 | | C | | | -0.30421 | | | -0.38025 | | 0.015915 |
| 4 | | C | | | -0.35133 | | | -0.37099 | | 0.014747 |
| 5 | | C | | | -0.53281 | | | -0.56734 | | -0.01492 |
| 6 | | C | | | -0.50914 | | | -0.57506 | | 0.020785 |
| 7 | | H | | | 0.167137 | | | 0.19676 | |  |
| 8 | | H | | | 0.166954 | | | 0.1872 | |  |
| 9 | | H | | | 0.170109 | | | 0.19267 | |  |
| 10 | | H | | | 0.184846 | | | 0.18676 | |  |
| 11 | | H | | | 0.159569 | | | 0.19537 | |  |
| 12 | | H | | | 0.160554 | | | 0.18743 | |  |
| 13 | | H | | | 0.186286 | | | 0.18334 | |  |
| 14 | | H | | | 0.179791 | | | 0.18556 | |  |
| 15 | | H | | | 0.170736 | | | 0.18956 | |  |
| 16 | | H | | | 0.175663 | | | 0.1871 | |  |
| 17 | | H | | | 0.171485 | | | 0.19161 | |  |
| 18 | | H | | | 0.175912 | | | 0.18922 | |  |
| 19 | | H | | | 0.17628 | | | 0.19457 | |  |
| 20 | | H | | | 0.177733 | | | 0.19062 | |  |
| ***3-methyl-pentane*** | | | | | | | | | | |
| **Sr.no** | | **Atoms** | | | | **Mulliken charges** | | **Natural population charges** | | **Mulliken charges with summed hydrogen** |
| 1 | | C | | | | -0.512387 | | -0.57624 | | -0.002054 |
| 2 | | C | | | | -0.33508 | | -0.37123 | | 0.004121 |
| 3 | | C | | | | -0.18403 | | -0.1943 | | -0.02641 |
| 4 | | C | | | | -0.3592 | | -0.37763 | | 0.004932 |
| 5 | | C | | | | -0.512 | | -0.56537 | | 0.001488 |
| 6 | | C | | | | -0.49939 | | -0.57978 | | 0.017924 |
| 7 | | H | | | | 0.171855 | | 0.19923 | |  |
| 8 | | H | | | | 0.16674 | | 0.19278 | |  |
| 9 | | H | | | | 0.171738 | | 0.18931 | |  |
| 10 | | H | | | | 0.174109 | | 0.18185 | |  |
| 11 | | H | | | | 0.165095 | | 0.18381 | |  |
| 12 | | H | | | | 0.157615 | | 0.184 | |  |
| 13 | | H | | | | 0.191005 | | 0.18952 | |  |
| 14 | | H | | | | 0.173122 | | 0.18315 | |  |
| 15 | | H | | | | 0.17228 | | 0.19571 | |  |
| 16 | | H | | | | 0.180855 | | 0.18737 | |  |
| 17 | | H | | | | 0.16035 | | 0.18905 | |  |
| 18 | | H | | | | 0.176166 | | 0.19596 | |  |
| 19 | | H | | | | 0.166945 | | 0.19831 | |  |
| 20 | | H | | | | 0.174202 | | 0.19449 | |  |
| ***Metformin*** | | | | | | | | | | |
| **Sr.no** | | **Atoms** | | | | **Mulliken charges** | | **Natural population charges** | | **Mulliken charges with summed hydrogen** |
| 1 | | N | | | | -0.504694 | | -0.48948 | | -0.504694 |
| 2 | | N | | | | -0.377119 | | -0.64136 | | -0.377119 |
| 3 | | N | | | | -0.620748 | | -0.79959 | | -0.373514 |
| 4 | | N | | | | -0.73817 | | -0.77286 | | -0.110329 |
| 5 | | N | | | | -0.723997 | | -0.81032 | | -0.067293 |
| 6 | | C | | | | -0.345677 | | -0.36821 | | 0.181052 |
| 7 | | C | | | | -0.381607 | | -0.36053 | | 0.171093 |
| 8 | | C | | | | 0.517487 | | 0.59979 | | 0.517487 |
| 9 | | C | | | | 0.563319 | | 0.63581 | | 0.563319 |
| 10 | | H | | | | 0.17545 | | 0.18061 | |  |
| 11 | | H | | | | 0.161343 | | 0.181 | |  |
| 12 | | H | | | | 0.189935 | | 0.20547 | |  |
| 13 | | H | | | | 0.176199 | | 0.20168 | |  |
| 14 | | H | | | | 0.197627 | | 0.19252 | |  |
| 15 | | H | | | | 0.178875 | | 0.16612 | |  |
| 16 | | H | | | | 0.247234 | | 0.33517 | |  |
| 17 | | H | | | | 0.317442 | | 0.37646 | |  |
| 18 | | H | | | | 0.310398 | | 0.37739 | |  |
| 19 | | H | | | | 0.348521 | | 0.41899 | |  |
| 20 | | H | | | | 0.308183 | | 0.37136 | |  |

*TableS7: Hirshfled calculations of 2-ethyl-oxetane along dipole components*

| **Sr.no** | | | **Atoms** | **Q-H** | | | | | | **S-H** | | | | | **Dx** | | | | | **Dy** | | | **Dz** | | | | **Q-CM5** | | |
| --- | --- | --- | --- | --- | --- | --- | --- | --- | --- | --- | --- | --- | --- | --- | --- | --- | --- | --- | --- | --- | --- | --- | --- | --- | --- | --- | --- | --- | --- |
| 1 | | | O | -0.21583 | | | | | | 0 | | | | | 0.084252 | | | | | 0.275954 | | | 0.019751 | | | | -0.29869 | | |
| 2 | | | C | 0.050471 | | | | | | 0 | | | | | -0.00447 | | | | | -0.05993 | | | 0.014644 | | | | 0.005233 | | |
| 3 | | | C | -0.07156 | | | | | | 0 | | | | | -0.00166 | | | | | 0.026315 | | | -0.01532 | | | | -0.16928 | | |
| 4 | | | C | 0.019153 | | | | | | 0 | | | | | -0.02119 | | | | | -0.03885 | | | -0.00736 | | | | -0.06173 | | |
| 5 | | | C | -0.06474 | | | | | | 0 | | | | | -0.01253 | | | | | -0.00296 | | | 0.013335 | | | | -0.17249 | | |
| 6 | | | C | -0.10207 | | | | | | 0 | | | | | 0.012434 | | | | | 0.015382 | | | 0.008422 | | | | -0.24574 | | |
| 7 | | | H | 0.038683 | | | | | | 0 | | | | | -0.02308 | | | | | 0.006028 | | | 0.13772 | | | | 0.108967 | | |
| 8 | | | H | 0.036969 | | | | | | 0 | | | | | 0.04729 | | | | | 0.054486 | | | 0.113209 | | | | 0.090015 | | |
| 9 | | | H | 0.046244 | | | | | | 0 | | | | | 0.013603 | | | | | 0.093499 | | | -0.10835 | | | | 0.100475 | | |
| 10 | | | H | 0.042875 | | | | | | 0 | | | | | 0.057093 | | | | | -0.00903 | | | -0.12989 | | | | 0.102917 | | |
| 11 | | | H | 0.041041 | | | | | | 0 | | | | | 0.106053 | | | | | -0.04408 | | | 0.072518 | | | | 0.098321 | | |
| 12 | | | H | 0.036687 | | | | | | 0 | | | | | 0.013537 | | | | | -0.01224 | | | -0.13562 | | | | 0.095104 | | |
| 13 | | | H | 0.032639 | | | | | | 0 | | | | | -0.03214 | | | | | 0.125091 | | | 0.014259 | | | | 0.088195 | | |
| 14 | | | H | 0.035233 | | | | | | 0 | | | | | -0.10366 | | | | | 0.050196 | | | -0.06981 | | | | 0.084156 | | |
| 15 | | | H | 0.035838 | | | | | | 0 | | | | | -0.00651 | | | | | -0.01814 | | | 0.138062 | | | | 0.089484 | | |
| 16 | | | H | 0.038253 | | | | | | 0 | | | | | 0.001872 | | | | | -0.11751 | | | -0.05383 | | | | 0.084952 | | |
| ***cyclopentane methyl*** | | | | | | | | | | | | | | | | | | | | | | | | | | | | | |
| **Sr.no** | | | **Atoms** | | | **Q-H** | | | | | | **S-H** | | | | **Dx** | | | | | **Dy** | | | | **Dz** | | | **Q-CM5** | |
| 1 | | | C | | | -0.01921 | | | | | | 0 | | | | -0.00736 | | | | | 0.007235 | | | | -0.03151 | | | -0.08372 | |
| 2 | | | C | | | -0.0656 | | | | | | 0 | | | | -0.01075 | | | | | 0.002783 | | | | -0.00091 | | | -0.17458 | |
| 3 | | | C | | | -0.06431 | | | | | | 0 | | | | 0.007559 | | | | | -0.00211 | | | | -0.00403 | | | -0.17602 | |
| 4 | | | C | | | -0.06325 | | | | | | 0 | | | | 0.006338 | | | | | 0.015327 | | | | 0.017729 | | | -0.16643 | |
| 5 | | | C | | | -0.06744 | | | | | | 0 | | | | -0.0033 | | | | | 0.005962 | | | | 0.006039 | | | -0.17338 | |
| 6 | | | C | | | -0.10342 | | | | | | 0 | | | | -0.00186 | | | | | 0.003089 | | | | 0.004245 | | | -0.2531 | |
| 7 | | | H | | | 0.024978 | | | | | | 0 | | | | 0.0654 | | | | | 0.00221 | | | | 0.097418 | | | 0.075864 | |
| 8 | | | H | | | 0.033975 | | | | | | 0 | | | | -0.0433 | | | | | 0.044867 | | | | 0.121629 | | | 0.088967 | |
| 9 | | | H | | | 0.031854 | | | | | | 0 | | | | 0.061998 | | | | | 0.113898 | | | | -0.03369 | | | 0.0882 | |
| 10 | | | H | | | 0.033206 | | | | | | 0 | | | | 0.03567 | | | | | 0.047159 | | | | -0.13223 | | | 0.093218 | |
| 11 | | | H | | | 0.033774 | | | | | | 0 | | | | -0.12006 | | | | | 0.032972 | | | | 0.056993 | | | 0.087635 | |
| 12 | | | H | | | 0.029442 | | | | | | 0 | | | | -0.11656 | | | | | -0.04075 | | | | 0.058112 | | | 0.08393 | |
| 13 | | | H | | | 0.028662 | | | | | | 0 | | | | 0.001856 | | | | | -0.05083 | | | | -0.11223 | | | 0.075862 | |
| 14 | | | H | | | 0.033004 | | | | | | 0 | | | | 0.051527 | | | | | -0.11292 | | | | -0.03791 | | | 0.084972 | |
| 15 | | | H | | | 0.031097 | | | | | | 0 | | | | -0.05128 | | | | | -0.04876 | | | | 0.118507 | | | 0.08754 | |
| 16 | | | H | | | 0.036685 | | | | | | 0 | | | | 0.079438 | | | | | -0.11197 | | | | 0.016017 | | | 0.088566 | |
| 17 | | | H | | | 0.035367 | | | | | | 0 | | | | 0.079687 | | | | | 0.11102 | | | | 0.000845 | | | 0.08659 | |
| 18 | | | H | | | 0.031244 | | | | | | 0 | | | | -0.05959 | | | | | -0.01594 | | | | -0.11787 | | | 0.085949 | |
| ***Cyclohexane*** | | | | | | | | | | | | | | | | | | | | | | | | | | | | | |
| **Sr.no** | | | **Atoms** | **Q-H** | | | | | | | **S-H** | | | | | **Dx** | | | | | **Dy** | | | **Dz** | | **Q-CM5** | | | |
| 1 | | | C | -0.0612 | | | | | | | 0 | | | | | 0.001184 | | | | | 0.009691 | | | 0.010045 | | -0.17049 | | | |
| 2 | | | C | -0.06119 | | | | | | | 0 | | | | | -0.00779 | | | | | 0.005767 | | | -0.01015 | | -0.17048 | | | |
| 3 | | | C | -0.06123 | | | | | | | 0 | | | | | -0.00883 | | | | | -0.00379 | | | 0.010096 | | -0.17051 | | | |
| 4 | | | C | -0.0612 | | | | | | | 0 | | | | | -0.00119 | | | | | -0.00971 | | | -0.01004 | | -0.17049 | | | |
| 5 | | | C | -0.06119 | | | | | | | 0 | | | | | 0.007788 | | | | | -0.00578 | | | 0.010139 | | -0.17048 | | | |
| 6 | | | C | -0.06122 | | | | | | | 0 | | | | | 0.008831 | | | | | 0.003789 | | | -0.01008 | | -0.17051 | | | |
| 7 | | | H | 0.032303 | | | | | | | 0 | | | | | -0.01488 | | | | | -0.12485 | | | 0.049683 | | 0.086457 | | | |
| 8 | | | H | 0.028901 | | | | | | | 0 | | | | | -0.00133 | | | | | -0.01103 | | | -0.12768 | | 0.084041 | | | |
| 9 | | | H | 0.028889 | | | | | | | 0 | | | | | 0.00899 | | | | | -0.00665 | | | 0.127682 | | 0.084022 | | | |
| 10 | | | H | 0.032324 | | | | | | | 0 | | | | | 0.10067 | | | | | -0.07531 | | | -0.04973 | | 0.086474 | | | |
| 11 | | | H | 0.03234 | | | | | | | 0 | | | | | 0.115543 | | | | | 0.049621 | | | 0.049698 | | 0.086486 | | | |
| 12 | | | H | 0.028884 | | | | | | | 0 | | | | | 0.010217 | | | | | 0.004336 | | | -0.12767 | | 0.08402 | | | |
| 13 | | | H | 0.028897 | | | | | | | 0 | | | | | 0.001313 | | | | | 0.011058 | | | 0.127681 | | 0.084036 | | | |
| 14 | | | H | 0.032304 | | | | | | | 0 | | | | | 0.014894 | | | | | 0.124826 | | | -0.04971 | | 0.086452 | | | |
| 15 | | | H | 0.032324 | | | | | | | 0 | | | | | -0.10066 | | | | | 0.075293 | | | 0.04977 | | 0.086474 | | | |
| 16 | | | H | 0.028892 | | | | | | | 0 | | | | | -0.00899 | | | | | 0.00666 | | | -0.12769 | | 0.084028 | | | |
| 17 | | | H | 0.028891 | | | | | | | 0 | | | | | -0.01022 | | | | | -0.00436 | | | 0.127679 | | 0.084028 | | | |
| 18 | | | H | 0.03234 | | | | | | | 0 | | | | | -0.11555 | | | | | -0.0496 | | | -0.04971 | | 0.086489 | | | |
| ***2-methyl-pentane*** | | | | | | | | | | | | | | | | | | | | | | | | | | | | | |
| **Sr.no** | | **Atoms** | | | **Q-H** | | | **S-H** | | | | | **Dx** | | | | | **Dy** | | | | | | **Dz** | | | **Q-CM5** | | |
| 1 | | C | | | -0.10438 | | | 0 | | | | | -0.0016 | | | | | -0.008999 | | | | | | 0.007221 | | | -0.25342 | | |
| 2 | | C | | | -0.01576 | | | 0 | | | | | -0.00661 | | | | | -0.000003 | | | | | | -0.01503 | | | -0.0896 | | |
| 3 | | C | | | -0.0599 | | | 0 | | | | | 0.006595 | | | | | -0.000007 | | | | | | -0.02091 | | | -0.16837 | | |
| 4 | | C | | | -0.05936 | | | 0 | | | | | -0.01062 | | | | | 0.000015 | | | | | | 0.015 | | | -0.17178 | | |
| 5 | | C | | | -0.10224 | | | 0 | | | | | 0.013846 | | | | | -0.000008 | | | | | | -0.00723 | | | -0.25294 | | |
| 6 | | C | | | -0.10438 | | | 0 | | | | | -0.0016 | | | | | 0.009001 | | | | | | 0.007222 | | | -0.25342 | | |
| 7 | | H | | | 0.033434 | | | 0 | | | | | 0.135699 | | | | | 0.004247 | | | | | | -0.00816 | | | 0.084962 | | |
| 8 | | H | | | 0.03231 | | | 0 | | | | | -0.04465 | | | | | 0.008393 | | | | | | -0.12458 | | | 0.084646 | | |
| 9 | | H | | | 0.033247 | | | 0 | | | | | -0.03705 | | | | | 0.112137 | | | | | | 0.066434 | | | 0.084838 | | |
| 10 | | H | | | 0.029912 | | | 0 | | | | | 0.059516 | | | | | 0.000011 | | | | | | 0.116264 | | | 0.087726 | | |
| 11 | | H | | | 0.029017 | | | 0 | | | | | -0.02524 | | | | | -0.1041 | | | | | | 0.071613 | | | 0.084391 | | |
| 12 | | H | | | 0.029019 | | | 0 | | | | | -0.02524 | | | | | 0.104159 | | | | | | 0.071518 | | | 0.084393 | | |
| 13 | | H | | | 0.030522 | | | 0 | | | | | 0.014742 | | | | | 0.106391 | | | | | | -0.0737 | | | 0.085831 | | |
| 14 | | H | | | 0.030522 | | | 0 | | | | | 0.014688 | | | | | -0.106518 | | | | | | -0.07354 | | | 0.085833 | | |
| 15 | | H | | | 0.032415 | | | 0 | | | | | -0.03087 | | | | | 0.109854 | | | | | | 0.07 | | | 0.083704 | | |
| 16 | | H | | | 0.03411 | | | 0 | | | | | -0.07877 | | | | | -0.000111 | | | | | | -0.11223 | | | 0.084937 | | |
| 17 | | H | | | 0.032414 | | | 0 | | | | | -0.0309 | | | | | -0.109688 | | | | | | 0.070235 | | | 0.083703 | | |
| 18 | | H | | | 0.033248 | | | 0 | | | | | -0.03708 | | | | | -0.112121 | | | | | | 0.066451 | | | 0.08484 | | |
| 19 | | H | | | 0.033434 | | | 0 | | | | | 0.135699 | | | | | -0.004264 | | | | | | -0.00814 | | | 0.084961 | | |
| 20 | | H | | | 0.032312 | | | 0 | | | | | -0.04463 | | | | | -0.008407 | | | | | | -0.12459 | | | 0.084649 | | |
| ***3-methyl-pentane*** | | | | | | | | | | | | | | | | | | | | | | | | | | | | | |
| **Sr.no** | | | **Atoms** | | | **Q-H** | | | **S-H** | | | | **Dx** | | | | | | **Dy** | | | | | **Dz** | | | | **Q-CM5** | | |
| 1 | | | C | | | -0.10224 | | | 0 | | | | 0.000782 | | | | | | 0.02267 | | | | | 0.002982 | | | | -0.24862 | | |
| 2 | | | C | | | -0.0641 | | | 0 | | | | 0.000481 | | | | | | -0.03118 | | | | | 0.007713 | | | | -0.17596 | | |
| 3 | | | C | | | -0.01383 | | | 0 | | | | 0.021661 | | | | | | -0.00245 | | | | | -0.01879 | | | | -0.08177 | | |
| 4 | | | C | | | -0.06256 | | | 0 | | | | 0.011916 | | | | | | 0.022628 | | | | | 0.00131 | | | | -0.17688 | | |
| 5 | | | C | | | -0.10493 | | | 0 | | | | -0.00619 | | | | | | -0.00387 | | | | | -0.00361 | | | | -0.2581 | | |
| 6 | | | C | | | -0.10298 | | | 0 | | | | -0.01039 | | | | | | -0.00967 | | | | | -0.01517 | | | | -0.25127 | | |
| 7 | | | H | | | 0.035019 | | | 0 | | | | -0.12949 | | | | | | 0.017345 | | | | | -0.04246 | | | | 0.084745 | | |
| 8 | | | H | | | 0.034075 | | | 0 | | | | 0.047997 | | | | | | -0.09894 | | | | | -0.06353 | | | | 0.081135 | | |
| 9 | | | H | | | 0.031397 | | | 0 | | | | -0.02439 | | | | | | -0.01549 | | | | | 0.134325 | | | | 0.083963 | | |
| 10 | | | H | | | 0.023927 | | | 0 | | | | -0.0582 | | | | | | 0.099041 | | | | | 0.064623 | | | | 0.083055 | | |
| 11 | | | H | | | 0.028801 | | | 0 | | | | -0.00557 | | | | | | 0.023909 | | | | | -0.1242 | | | | 0.082611 | | |
| 12 | | | H | | | 0.029068 | | | 0 | | | | -0.01338 | | | | | | 0.009462 | | | | | 0.117685 | | | | 0.081841 | | |
| 13 | | | H | | | 0.029769 | | | 0 | | | | -0.03392 | | | | | | -0.09776 | | | | | 0.08588 | | | | 0.088123 | | |
| 14 | | | H | | | 0.030137 | | | 0 | | | | -0.01447 | | | | | | -0.05411 | | | | | -0.11746 | | | | 0.086482 | | |
| 15 | | | H | | | 0.036375 | | | 0 | | | | 0.021987 | | | | | | -0.13392 | | | | | -0.03559 | | | | 0.089639 | | |
| 16 | | | H | | | 0.031938 | | | 0 | | | | 0.048786 | | | | | | 0.065463 | | | | | -0.11192 | | | | 0.087071 | | |
| 17 | | | H | | | 0.036604 | | | 0 | | | | 0.033536 | | | | | | 0.047753 | | | | | 0.117559 | | | | 0.085545 | | |
| 18 | | | H | | | 0.030663 | | | 0 | | | | 0.103925 | | | | | | 0.007392 | | | | | 0.08332 | | | | 0.083267 | | |
| 19 | | | H | | | 0.03743 | | | 0 | | | | -0.07744 | | | | | | 0.103163 | | | | | 0.033657 | | | | 0.086574 | | |
| 20 | | | H | | | 0.035459 | | | 0 | | | | 0.046201 | | | | | | 0.01549 | | | | | -0.13204 | | | | 0.088561 | | |

| ***Metformin*** | | | | | | | | |
| --- | --- | --- | --- | --- | --- | --- | --- | --- |
| **Sr.no** | | **Atoms** | **Q-H** | **S-H** | **Dx** | **Dy** | **Dz** | **Q-CM5** |
| 1 | | N | 0.119018 | 0 | 0.050708 | 0.042379 | 0.131377 | -0.388784 |
| 2 | | N | -0.269361 | 0 | 0.028875 | -0.297074 | -0.040428 | -0.435251 |
| 3 | | N | -0.305474 | 0 | -0.177835 | 0.113183 | -0.007362 | -0.598005 |
| 4 | | N | -0.19795 | 0 | -0.028912 | 0.0387 | -0.171209 | -0.654606 |
| 5 | | N | -0.209485 | 0 | -0.109984 | 0.002168 | 0.176112 | -0.657825 |
| 6 | | C | -0.045439 | 0 | 0.002421 | -0.039085 | 0.007282 | -0.121715 |
| 7 | | C | -0.035756 | 0 | 0.005654 | 0.031867 | -0.033553 | -0.121503 |
| 8 | | C | 0.163481 | 0 | -0.022684 | 0.075557 | 0.000798 | 0.365514 |
| 9 | | C | 0.190521 | 0 | 0.008984 | -0.02734 | -0.001915 | 0.392438 |
| 10 | | H | 0.030027 | 0 | 0.016899 | 0.088447 | 0.085097 | 0.089527 |
| 11 | | H | 0.034443 | 0 | -0.128749 | 0.027176 | -0.006655 | 0.097769 |
| 12 | | H | 0.045791 | 0 | 0.048808 | 0.049058 | -0.121528 | 0.108367 |
| 13 | | H | 0.047878 | 0 | 0.010738 | -0.132695 | 0.010532 | 0.109145 |
| 14 | | H | 0.045342 | 0 | -0.144683 | 0.020493 | -0.005025 | 0.109052 |
| 15 | | H | 0.028242 | 0 | -0.004701 | 0.035871 | 0.118932 | 0.090469 |
| 16 | | H | 0.100916 | 0 | -0.140092 | -0.087234 | -0.063023 | 0.289987 |
| 17 | | H | 0.133795 | 0 | 0.17525 | -0.028755 | -0.0978 | 0.340126 |
| 18 | | H | 0.133466 | 0 | -0.024653 | 0.200119 | -0.004494 | 0.333808 |
| 19 | | H | 0.086932 | 0 | -0.034378 | -0.089924 | 0.003615 | 0.323036 |
| 20 | | H | 0.141579 | 0 | 0.097062 | -0.078618 | 0.153339 | 0.328382 |

*
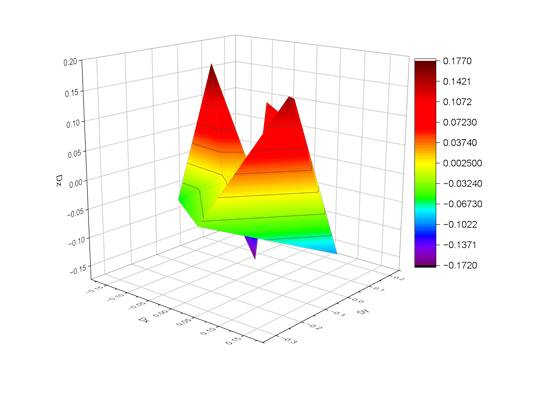
*

***Figure 1: a)-Hirshfled Graphical representation of metformin along their dipole components;***

*Table S8: Experimental and Theoretical IR Spectra for 2-ethyl oxetane and cyclopentane methyl with basic sets B3-LYP*

| **DFT models** | **Target** | **Mode** | **Experimental IR** | **DFT** | | **IR** | **Vibrational mode** | **Target** | **Mode** | **Experimental IR** | **DFT** | | | **IR** | **Vibrational mode** |
| --- | --- | --- | --- | --- | --- | --- | --- | --- | --- | --- | --- | --- | --- | --- | --- |
| **Unscaled value** | **Scaled value** | **Unscaled value** | **Scaled value** | |
| **B3LYP** | **2-ethyl oxetane** | 42 | 3170 cm-1 | 3118.50 | 3015.59 | 71.1178 | ν CH (8) + ν CH (9) | **Cyclopentane methyl** | 1 | --------------- | 54.98 | 53.17 | | 0.0006 | ν CH (10) + ν CH (11), ν CH (12) + ν CH (13) |
|  |  | 41 | 3130 cm-1 | 3101.84 | 2999.48 | 29.3437 | ν CH (14) + ν CH (15) |  | 2 | --------------- | 168.00 | 162.45 | | 0.0256 | ν CH (16) + ν CH (17) + ν CH (18) |
|  |  | 40 | 3090 cm-1 | 3093.33 | 2991.25 | 7.9382 | ν CH (10) + ν CH (11) |  | 3 | 293.198 cm-1 | 214.45 | 207.37 | | 0.0547 | ν CH (16) + ν CH (17) |
|  |  | 39 | --------------- | 3081.44 | 2979.75 | 59.0876 | ν CH (12) + ν CH (7), ν CH (14) + ν CH (15) |  | 4 | 359.313 cm-1 | 358.36 | 346.53 | | 0.0123 | ν CH (8) + ν CH (9) |
|  |  | 38 | 3050 cm-1 | 3059.44 | 2958.48 | 31.5780 | ν CH (9) + ν CH (8), ν CH (10) + ν CH (11) |  | 5 | 374.571 cm-1 | 376.50 | 364.07 | | 0.2888 | ν CH (15) + ν CH (14) |
|  |  | 37 | 3050 cm-1 | 3046.32 | 2945.79 | 29.7268 | ν CH (12) + ν CH (13), ν CH (14) + ν CH (15) + ν CH (16), ν CH (9) + ν CH (8), ν CH (10) + ν CH (11) |  | 6 | 644.12 cm-1 | 645.74 | 624.43 | | 0.0073 | ν CH (12) + ν CH (13) |
|  |  | 36 | ---------------- | 3043.50 | 2943.07 | 104.0961 | ν CH (16) + ν CH (15), ν CH (7), ν CH (12) + ν CH (13) |  | 7 | 674.63 cm-1 | 673.72 | 651.49 | | 2.6014 | ν CH (15) + ν CH (14) |
|  |  | 35 | ------------------- | 3023.25 | 2923.48 | 9.8802 | ν CH (7), ν CH (12) + ν CH (13) |  | 8 | 756.009 cm-1 | 775.09 | 749.51 | | 1.3019 | ν CH (7) |
|  |  | 34 | 3010 cm-1 | 3015.65 | 2916.13 | 28.4666 | ν CH (16) + ν CH (15) + ν CH (14) |  | 9 | 822.12 cm-1 | 822.62 | 795.47 | | 0.7763 | ν CH (10) + ν CH (11), ν CH (12) + ν CH (13) |
|  |  | 33 | ----------------- | 2993.71 | 2894.91 | 37.3128 | ν CH (12) + ν CH (13) |  | 10 | 822.12 cm-1 | 822.87 | 795.72 | | 0.0281 | ν CH (8) + ν CH (9), ν CH (15) + ν CH (14) |
|  |  | 32 | 1570cm-1 | 1559.67 | 1508.20 | 0.1732 | ν CH (10) + ν CH (11) + ν CH (9) |  | 11 | 883.15 cm-1 | 884.78 | 855.58 | | 1.2100 | ν CH (16) + ν CH (17) + ν CH (18) |
|  |  | 31 | 1530 cm-1 | 1549.71 | 1498.57 | 9.3193 | ν CH (16) + ν CH (15) + ν CH (14), ν CH (12) + ν CH (13) |  | 12 | 898.41 cm-1 | 896.84 | 867.24 | | 1.9649 | ν CH (16) + ν CH (17) + ν CH (18), ν CH (8) + ν CH (9), ν CH (7) |
|  |  | 30 | ---------------- | 1536.99 | 1486.27 | 8.5071 | ν CH (16) + ν CH (15) + ν CH (14) |  | 13 | 934.01 cm-1 | 933.48 | 902.67 | | 1.4816 | ν CH (10) + ν CH (11), ν CH (12) + ν CH (13) |
|  |  | 29 | ---------------- | 1526.66 | 1476.28 | 6.9349 | ν CH (9) + ν CH (8), ν CH (10) + ν CH (11) |  | 14 | 989.95 cm-1 | 989.50 | 956.84 | | 1.3106 | ν CH (16) + ν CH (17) + ν CH (18) |
|  |  | 28 | ---------------- | 1515.88 | 1465.86 | 3.1967 | ν CH (13) + ν CH (12), ν CH (16) + ν CH (15) + ν CH (14) |  | 15 | 1005.21 cm-1 | 1004.82 | 971.66 | | 0.1747 | ν CH (8) + ν CH (9) |
|  |  | 27 | 1450 cm-1 | 1447.93 | 1400.15 | 10.1976 | CH (16) + ν CH (15) + ν CH (14) |  | 16 | 1045.90 cm-1 | 1047.24 | 1012.68 | | 0.3353 | ν CH (10) + ν CH (11) |
|  |  | 26 | 1410 cm-1 | 1416.85 | 1370.10 | 4.3672 | ν CH (13) + ν CH (12), ν CH (7) |  | 17 | 1056.07 cm-1 | 1059.65 | 1024.69 | | 0.1149 | ν CH (15) + ν CH (14) |
|  |  | 25 | 1370 cm-1 | 1372.23 | 1326.95 | 1.6047 | ν CH (9) + ν CH (10) + ν CH (11), ν CH (13), ν CH (7) |  | 18 | 1086.58 cm-1 | 1089.92 | 1053.95 | | 0.3727 | ν CH (8) + ν CH (9), ν CH (15) + ν CH (14) |
|  |  | 24 | ---------------- | 1357.36 | 1312.57 | 10.3075 | ν CH (9) + ν CH (10) + ν CH (11), ν CH (13) + ν CH (12), ν CH (7) |  | 19 | 1157.79 cm-1 | 1155.17 | 1117.05 | | 1.8700 | ν CH (16) + ν CH (17) + ν CH (18) |
|  |  | 23 | 1330 cm-1 | 1328.97 | 1285.11 | 1.1399 | ν CH (9) + ν CH (8), ν CH (13) + ν CH (12) |  | 20 | 1198.47 cm-1 | 1198.99 | 1159.42 | | 2.2526 | ν CH (8) + ν CH (9), ν CH (7) |
|  |  | 22 | ---------------- | 1301.90 | 1258.94 | 10.0715 | ν CH (9) + ν CH (8), ν CH (13) + ν CH (12) |  | 21 | 1234.07 cm-1 | 1236.71 | 1195.90 | | 0.2091 | ν CH (10) + ν CH (11), ν CH (15) + ν CH (14) |
|  |  | 21 | 1290 cm-1 | 1282.42 | 1240.10 | 0.7008 | ν CH (9), ν CH (7), ν CH (11) + ν CH (10) |  | 22 | 1254.42 cm-1 | 1252.94 | 1211.60 | | 0.8787 | ν CH (10) + ν CH (11), ν CH (12) + ν CH (13) |
|  |  | 20 | 1250 cm-1 | 1248.42 | 1207.22 | 0.1909 | ν CH (9) + ν CH (8), ν CH (11) + ν CH (12) |  | 23 | 1264.59 cm-1 | 1266.48 | 1224.69 | | 0.7680 | ν CH (10) + ν CH (11), ν CH (15) + ν CH (14) |
|  |  | 19 | 1210 cm-1 | 1208.28 | 1168.40 | 2.4918 | ν CH (16) + ν CH (15) + ν CH (14), ν CH (13) + ν CH (12) |  | 24 | 1315.45 cm-1 | 1314.30 | 1270.93 | | 0.0861 | ν CH (8) + ν CH (9), ν CH (15) + ν CH (14) |
|  |  | 18 | 1130 cm-1 | 1139.26 | 1101.67 | 1.0853 | ν CH (10) + ν CH (11), ν CH (9) + ν CH (10) |  | 25 | 1335.79 cm-1 | 1333.61 | 1289.60 | | 0.1415 | ν CH (10) + ν CH (11), ν CH (15) + ν CH (14) |
|  |  | 17 | ---------------- | 1119.41 | 1082.47 | 0.6646 | ν CH (16) + ν CH (15) + ν CH (14), ν CH (13) + ν CH (12), ν CH (9) + ν CH (10) |  | 26 | 1351.05 cm-1 | 1353.91 | 1309.24 | | 0.0286 | ν CH (15) + ν CH (14) |
|  |  | 16 | ---------------- | 1106.96 | 1070.43 | 4.1460 | ν CH (10) + ν CH (11), ν CH (12) + ν CH (13) |  | 27 | 1366.30 cm-1 | 1366.30 | | 1321.21 | 1.6083 | ν CH (8) + ν CH (9) |
|  |  | 15 | ---------------- | 1031.36 | 997.32 | 4.2881 | ν CH (10) + ν CH (11), ν CH (8) + ν CH (9) |  | 28 | ---------------- | 1368.86 | | 1323.69 | 0.1759 | ν CH (10) + ν CH (11) |
|  |  | 14 | 1010 cm-1 | 1003.67 | 970.55 | 2.6460 | ν CH (16) + ν CH (15) + ν CH (14), ν CH (13) + ν CH (12), ν CH (9) + ν CH (10), ν CH (7) |  | 29 | 1401.91 cm-1 | 1400.19 | | 1353.98 | 3.4143 | ν CH (8) + ν CH (9), ν CH (15) + ν CH (14) |
|  |  | 13 | 970 cm-1 | 978.36 | 946.07 | 1.4876 | ν CH (13) + ν CH (12), ν CH (9) + ν CH (8) |  | 30 | 1442.59 cm-1 | 1444.93 | | 1397.24 | 9.7340 | ν CH (16) + ν CH (17) + ν CH (18) |
|  |  | 12 | 930 cm-1 | 934.02 | 903.20 | 92.1194 | ν O(1), ν CH (10) + ν CH (11) |  | 31 | 1523.97 cm-1 | 1525.27 | | 1474.94 | 5.4815 | ν CH (8) + ν CH (9), ν CH (15) + ν CH (14), ν CH (16) + ν CH (17) + ν CH (18) |
|  |  | 11 | 890 cm-1 | 891.17 | 861.76 | 10.6376 | ν CH (10) + ν CH (11), ν CH (9) + ν CH (8) |  | 32 | 1529.05 cm-1 | 1529.09 | | 1478.63 | 1.1897 | ν CH (10) + ν CH (11), ν CH (8) + ν CH (9 |
|  |  | 10 | 850 cm-1 | 856.08 | 827.83 | 13.6620 | ν CH (10) + ν CH (11), ν CH (9) + ν CH (8), ν CH (12) + ν CH (13), ν CH (15) + ν CH (16) |  | 33 | 1534.14 cm-1 | 1532.64 | | 1482.07 | 7.4228 | ν CH (15) + ν CH (14), ν CH (10) + ν CH (11) |
|  |  | 9 | 810 cm-1 | 827.31 | 800.01 | 7.1277 | ν CH (10) + ν CH (11), ν CH (9) + ν CH (8) |  | 34 | 1544.31 cm-1 | 1543.16 | | 1492.24 | 11.9579 | ν CH (15) + ν CH (14), ν CH (10) + ν CH (11) |
|  |  | 8 | 770 cm-1 | 793.19 | 767.01 | 6.8628 | ν CH (10) + ν CH (11), ν CH (9) + ν CH (8) |  | 35 | 1544.31 cm-1 | 1543.23 | | 1492.30 | 0.1546 | ν CH (16) + ν CH (17) + ν CH (18) |
|  |  | 7 | 730 cm-1 | 721.93 | 698.11 | 0.3015 | ν CH (10) + ν CH (11), ν CH (9) + ν CH (8), ν CH (12) + ν CH (13), ν CH (15) + ν CH (16) |  | 36 | 1554.48 cm-1 | 1554.66 | | 1503.35 | 3.8219 | ν CH (12) + ν CH (13), ν CH (10) + ν CH (11) |
|  |  | 6 | 450 cm-1 | 445.21 | 430.52 | 3.9528 | ν CH (9) + ν CH (8), ν CH (7) + ν CO (1) |  | 37 | 3003.94 cm-1 | 3004.95 | | 2905.79 | 24.3535 | ν CH (8) + ν CH (9), ν CH (15) + ν CH (14), ν CH (16) + ν CH (17) + ν CH (18), ν CH (7) |
|  |  | 5 | ---------------- | 401.25 | 388.01 | 1.1402 | ν CH (10) + ν CH (11), ν CH (9) + ν CH (8), ν CH (12) + ν CH (13), ν CH (15) + ν CH (16) |  | 38 | 3009.03 cm-1 | 3006.00 | | 2906.80 | 17.9023 | ν CH (15) + ν CH (14), ν CH (10) + ν CH (11) |
|  |  | 4 | ---------------- | 84.06 | 233.76 | 3.3423 | ), ν CH (9) + ν CH (8), ν CH (15) + ν CH (16) |  | 39 | 3014.12 cm-1 | 3010.84 | | 2911.48 | 26.8367 | ν CH (15) + ν CH (14), ν CH (8) + ν CH (9) |
|  |  | 3 | ---------------- | 115.43 | 197.22 | 1.3352 | ν CH (10) + ν CH (11), ν CH (7) + ν O (1) |  | 40 | 3024.29 cm-1 | 3022.12 | | 2922.39 | 35.2019 | ν CH (10) + ν CH (11), ν CH (12) + ν CH (13) |
|  |  | 2 | ---------------- | 203.95 | 111.62 | 2.7538 | ν CH (15) + ν CH (16), ν CH (12) + ν CH (13) |  | 41 | 3029.37 cm-1 | 3027.13 | | 2927.24 | 97.7188 | ν CH (16) + ν CH (17) + ν CH (18) |
|  |  | 1 | ---------------- | 241.74 | 81.29 | 0.0478 | ν CH (10) + ν CH (11), ν CH (7) + ν O (1) |  | 42 | 3039.55 cm-1 | 3040.36 | | 2940.03 | 11.8647 | ν CH (10) + ν CH (11), ν CH (15) + ν CH (14) |
|  |  |  |  |  |  |  |  |  | 43 | 3049.72 cm-1 | 3048.37 | | 2947.77 | 37.5246 | ν CH (8) + ν CH (9) |
|  |  |  |  |  |  |  |  |  | 44 | 3059.89 cm-1 | 3062.16 | | 2961.11 | 10.6190 | ν CH (15) + ν CH (14), ν CH (8) + ν CH (9) |
|  |  |  |  |  |  |  |  |  | 45 | 3064.97 cm-1 | 3065.35 | | 2964.20 | 0.8987 | ν CH (16) + ν CH (17) + ν CH (18) |
|  |  |  |  |  |  |  |  |  | 46 | 3075.15 cm-1 | 3074.41 | | 2972.95 | 63.2097 | ν CH (16) + ν CH (17) + ν CH (18) |
|  |  |  |  |  |  |  |  |  | 47 | 3075.15 cm-1 | 3074.59 | | 2973.13 | 73.8548 | ν CH (16) + ν CH (17) + ν CH (18), ν CH (8) + ν CH (9) |
|  |  |  |  |  |  |  |  |  | 48 | 3085.32 cm-1 | 3085.67 | | 2983.84 | 112.4745 | ν CH (10) + ν CH (9), ν CH (11) + ν CH (12) |

Table S9: Experimental and Theoretical IR Spectra for 2-methyl-Pentane and 3-methyl-Pentane with basic sets B3-LYP

| **DFT models** | **Mode** | **Experimental IR** | **DFT** | | | **IR** | **Vibrational mode** | **Mode** | **Experimental IR** | | **DFT** | | | **IR** | **Vibrational mode** |
| --- | --- | --- | --- | --- | --- | --- | --- | --- | --- | --- | --- | --- | --- | --- | --- |
| **Unscaled value** | **Scaled value** | | **Unscaled value** | | **Scaled value** |
| **B3LYP** | 1 | ---------------- | 64.62 | 62.36 | | 0.0298 | ν CH (16) + ν CH (17)+ ν CH (15) | 1 | ---------------- | | 63.11 | | 60.90 | 0.0054 | ν CH (16) + ν CH (17)+ ν CH (15), ν CH (13) + ν CH (14) |
|  | 2 | ---------------- | 110.05 | 106.20 | | 0.0206 | ν CH (16) + ν CH (17)+ ν CH (15), ν CH (18) + ν CH (19)+ ν CH (20), ν CH (7) + ν CH (8)+ ν CH (9), ν CH (10), ν CH (11) + ν CH (12), ν CH (13) + ν CH (4) | 2 | ---------------- | | 102.39 | | 98.81 | 0.0250 | ν CH (8)+ ν CH (9), ν CH (12), ν CH (10) + ν CH (11) |
|  | 3 | ---------------- | 209.00 | 201.69 | | 0.1098 | ν CH (19)+ ν CH (20) | 3 | 240.85 cm-1 | 209.88 | | | 202.54 | 0.0324 | ν CH (16) + ν CH (17)+ ν CH (15), ν CH (18) + ν CH (19)+ ν CH (20) |
|  | 4 | ---------------- | 224.51 | 216.65 | | 0.0003 | ν CH (16) + ν CH (17)+ ν CH (15) | 4 | 247.34 cm-1 | | 213.73 | | 206.25 | 0.0052 | ν CH (7) + ν CH (8)+ ν CH (9) |
|  | 5 | ---------------- | 243.93 | 235.39 | | 0.0028 | ν CH (18) + ν CH (19)+ ν CH (20) | 5 | 253.61 cm-1 | | 216.96 | | 209.37 | 0.0069 | ν CH (16) + ν CH (17)+ ν CH (15), ν CH (18) + ν CH (19)+ ν CH (20), ν CH (7) + ν CH (8)+ ν CH (9), ν CH (12), ν CH (10) + ν CH (11), ν CH (13) + ν CH (14) |
|  | 6 | ---------------- | 257.80 | 248.78 | | 0.1071 | ν CH (7) + ν CH (8)+ ν CH (9), ν CH (18) + ν CH (19)+ ν CH (20) | 6 | 260 cm-1 | | 258.01 | | 248.98 | 0.0561 | ν CH (16) + ν CH (17)+ ν CH (15) |
|  | 7 | ---------------- | 313.25 | 302.28 | | 0.0165 | ν CH (18) + ν CH (19)+ ν CH (20) | 7 | 291cm-1 | | 294.99 | | 284.66 | 0.0157 | ν CH (16) + ν CH (17)+ ν CH (15), ν CH (18) + ν CH (19)+ ν CH (20) |
|  | 8 | ---------------- | 376.10 | 362.93 | | 0.0569 | + ν CH (12), ν CH (13) | 8 | 394 cm-1 | | 392.78 | | 379.04 | 0.0739 | ν CH (16) + ν CH (17)+ ν CH (15), ν CH (18) + ν CH (19)+ ν CH (20), ν CH (7) + ν CH (8)+ ν CH (9), ν CH (12), ν CH (10) + ν CH (11), ν CH (13) + ν CH (14) |
|  | 9 | 445cm-1 | 400.59 | 386.57 | | 0.1133 | ν CH (18) + ν CH (19)+ ν CH (20), ν CH (7) + ν CH (8)+ ν CH (9) | 9 | 445cm-1 | | 448.11 | | 432.42 | 0.2185 | ν CH (10) + ν CH (11), ν CH (13) + ν CH (14) |
|  | 10 | 560cm-1 | 561.51 | 541.86 | | 1.5797 | ν CH (7) + ν CH (8)+ ν CH (9), ν CH (18) + ν CH (19)+ ν CH (20) | 10 | 477cm-1 | | 476.28 | 459.61 | | 0.4836 | ν CH (16) + ν CH (17)+ ν CH (15), ν CH (18) + ν CH (19)+ ν CH (20) |
|  | 11 | 760cm-1 | 760.32 | 733.71 | | 3.0056 | ν CH (11) + ν CH (12), ν CH (13) + ν CH (14) | 11 | 751.94cm-1 | | 752.84 | 726.49 | | 1.2123 | ν CH (13) + ν CH (14), ν CH (12) |
|  | 12 | 780cm-1 | 782.16 | 754.79 | | 0.0194 | ν CH (16) + ν CH (17)+ ν CH (15), ν CH (18) + ν CH (19)+ ν CH (20), ν CH (7) + ν CH (8)+ ν CH (9) | 12 | 796.17cm-1 | | 797.74 | 769.82 | | 2.9668 | ν CH (16) + ν CH (17)+ ν CH (15), ν CH (13) + ν CH (14) |
|  | 13 | 890cm-1 | 888.93 | 857.82 | | 0.0574 | ν CH (16) + ν CH (17)+ ν CH (15), ν CH (13) + ν CH (4) | 13 | 834.47cm-1 | | 835.99 | 806.73 | | 1.5818 | ν CH (16) + ν CH (17)+ ν CH (15), ν CH (13) + ν CH (14) |
|  | 14 | 895cm-1 | 896.45 | 865.07 | | 3.0406 | ν CH (7) + ν CH (8)+ ν CH (9) | 14 | 885.53cm-1 | | 888.83 | 857.72 | | 0.6974 | ν CH (7) + ν CH (8)+ ν CH (9), ν CH (12), ν CH (10) + ν CH (11) |
|  | 15 | 950cm-1 | 952.13 | 918.81 | | 0.6794 | ν CH (18) + ν CH (19)+ ν CH (20) | 15 | 981.27cm-1 | | 980.80 | 946.47 | | 3.6267 | ν CH (10) + ν CH (11), ν CH (13) + ν CH (14) |
|  | 16 | 975cm-1 | 977.93 | 943.70 | | 1.1622 | ν CH (7) + ν CH (8)+ ν CH (9) | 16 | 987.66cm-1 | | 998.48 | 963.53 | | 1.3441 | ν CH (7) + ν CH (8)+ ν CH (9), ν CH (12), ν CH (10) + ν CH (11) |
|  | 17 | 985cm-1 | 985.28 | 950.80 | | 0.0308 | ν CH (7) + ν CH (8)+ ν CH (9), ν CH (10) | 17 | 1019.57cm-1 | | 1020.31 | 984.60 | | 8.7463 | ν CH (16) + ν CH (17)+ ν CH (15), ν CH (18) + ν CH (19)+ ν CH (20), ν CH (7) + ν CH (8)+ ν CH (9), ν CH (12), ν CH (10) + ν CH (11), ν CH (13) + ν CH (14) |
|  | 18 | 1050cm-1 | 1051.31 | 1014.52 | | 0.3155 | ν CH (13) + ν CH (14) | 18 | 1051.49cm-1 | | 1050.34 | 1013.58 | | 0.3265 | ν CH (12), ν CH (10) + ν CH (11), ν CH (13) + ν CH (14) |
|  | 19 | 1055cm-1 | 1054.83 | 1017.91 | | 0.1602 | ν CH (11) + ν CH (12) | 19 | 1057.87cm-1 | | 1052.31 | 1015.48 | | 0.7418 | ν CH (16) + ν CH (17)+ ν CH (15), ν CH (12) |
|  | 20 | 1075cm-1 | 1075.24 | 1037.61 | | 0.6287 | ν CH (16) + ν CH (17)+ ν CH (15) | 20 | 1070cm-1 | | 1071.15 | 1033.66 | | 0.4532 | ν CH (16) + ν CH (17)+ ν CH (15), ν CH (18) + ν CH (19)+ ν CH (20), ν CH (7) + ν CH (8)+ ν CH (9), ν CH (12), ν CH (10) + ν CH (11), ν CH (13) + ν CH (14) |
|  | 21 | 1180cm-1 | 1183.33 | 1141.91 | | 4.3093 | ν CH (16) + ν CH (17)+ ν CH (15), ν CH (18) + ν CH (19)+ ν CH (20), ν CH (7) + ν CH (8)+ ν CH (9), ν CH (10), ν CH (11) + ν CH (12), ν CH (13) + ν CH (14) | 21 | 1179cm-1 | | 1182.33 | 1140.95 | | 2.0190 | ν CH (12), ν CH (10) + ν CH (11), ν CH (13) + ν CH (14) |
|  | 22 | 1210cm-1 | 1211.56 | 1169.16 | | 1.9888 | ν CH (13) + ν CH (4) | 22 | 1198.30cm-1 | | 1196.94 | 1155.05 | | 0.6596 | ν CH (18) + ν CH (19)+ ν CH (20), ν CH (7) + ν CH (8)+ ν CH (9) |
|  | 23 | 1225cm-1 | 1222.44 | 1179.65 | | 3.3682 | ν CH (18) + ν CH (19)+ ν CH (20), ν CH (7) + ν CH (8)+ ν CH (9) | 23 | 1223.83cm-1 | | 1222.31 | 1179.53 | | 0.1456 | ν CH (18) + ν CH (19)+ ν CH (20), ν CH (13) + ν CH (14) |
|  | 24 | 1300cm-1 | 1302.89 | 1257.29 | | 0.3071 | ν CH (11) + ν CH (12) | 24 | 1306.81cm-1 | | 1306.45 | 1260.72 | | 0.9758 | ν CH (12), ν CH (10) + ν CH (11), ν CH (13) + ν CH (14) |
|  | 25 | 1335cm-1 | 1335.33 | 1288.59 | | 2.3337 | ν CH (11) + ν CH (12), ν CH (13) + ν CH (14) | 25 | 1332.34cm-1 | | 1330.78 | 1284.20 | | 0.5602 | ν CH (12), ν CH (13) + ν CH (14) |
|  | 26 | 1355cm-1 | 1355.82 | 1308.37 | | 0.0605 | ν CH (10), ν CH (11) + ν CH (12), ν CH (13) + ν CH (14) | 26 | 1357.87cm-1 | | 1358.00 | 1310.47 | | 1.8054 | ν CH (12), ν CH (10), ν CH (14) |
|  | 27 | 1385cm-1 | 1386.62 | 1338.09 | | 1.5477 | ν CH (10), ν CH (13) + ν CH (14) | 27 | 1370.64cm-1 | | 1373.40 | 1325.34 | | 1.7846 | ν CH (12), ν CH (11), ν CH (13) |
|  | 28 | 1395cm-1 | 1397.47 | 1348.56 | | 5.3232 | ν CH (10), ν CH (11) + ν CH (12) | 28 | 1396.17cm-1 | | 1397.26 | 1348.36 | | 0.5201 | ν CH (12), ν CH (13) + ν CH (14) |
|  | 29 | 1425cm-1 | 1424.46 | | 1374.61 | 0.3187 | ν CH (10), ν CH (11) + ν CH (12), ν CH (13) + ν CH (14) | 29 | 1408.94cm-1 | | 1406.02 | 1356.81 | | 2.0406 | ν CH (12), ν CH (10) + ν CH (11), ν CH (13) + ν CH (14) |
|  | 30 | 1435cm-1 | 1435.49 | | 1385.24 | 10.0055 | ν CH (18) + ν CH (19)+ ν CH (20), ν CH (7) + ν CH (8)+ ν CH (9) | 30 | 1440.85cm-1 | | 1440.01 | 1389.61 | | 9.7834 | ν CH (16) + ν CH (17)+ ν CH (15), ν CH (18) + ν CH (19)+ ν CH (20) |
|  | 31 | 1445cm-1 | 1448.32 | | 1397.63 | 2.2887 | ν CH (16) + ν CH (17)+ ν CH (15) | 31 | 1447.23cm-1 | | 1449.95 | 1399.20 | | 4.3246 | ν CH (8) + ν CH (9) |
|  | 32 | 1455cm-1 | 1453.73 | | 1402.85 | 11.8205 | ν CH (18) + ν CH (19)+ ν CH (20), ν CH (7) + ν CH (8)+ ν CH (9) | 32 | 1453.62cm-1 | | 1450.49 | 1399.73 | | 8.7415 | ν CH (16) + ν CH (17)+ ν CH (15) |
|  | 33 | 1520cm-1 | 1523.21 | | 1469.90 | 1.4530 | ν CH (11) + ν CH (12), ν CH (13) + ν CH (14) | 33 | 1523.83cm-1 | | 1523.95 | 1470.61 | | 0.4060 | ν CH (10) + ν CH (11), ν CH (13) + ν CH (14) |
|  | 34 | 1525cm-1 | 1528.40 | | 1474.90 | 1.0339 | ν CH (18) + ν CH (19)+ ν CH (20), ν CH (7) + ν CH (8)+ ν CH (9) | 34 | 1530.21cm-1 | | 1533.29 | 1479.63 | | 3.0860 | ν CH (16) + ν CH (17)+ ν CH (15), ν CH (18) + ν CH (19)+ ν CH (20), ν CH (10) + ν CH (11), ν CH (13) + ν CH (14) |
|  | 35 | 1535cm-1 | 1536.52 | | 1482.74 | 1.3011 | ν CH (16) + ν CH (17)+ ν CH (15), ν CH (10), ν CH (11) + ν CH (12) | 35 | 1536.60cm-1 | | 1537.44 | 1483.63 | | 10.0429 | ν CH (16) + ν CH (17)+ ν CH (15), ν CH (18) + ν CH (19)+ ν CH (20) |
|  | 36 | 1540cm-1 | 1537.43 | | 1483.62 | 10.7652 | ν CH (16) + ν CH (17)+ ν CH (15) | 36 | 1542.98cm-1 | | 1540.24 | 1486.33 | | 1.7195 | ν CH (13) + ν CH (14), ν CH (18) + ν CH (19)+ ν CH (20) |
|  | 37 | 1540cm-1 | 1540.17 | | 1486.26 | 0.3206 | ν CH (16) + ν CH (17)+ ν CH (15), ν CH (18) + ν CH (19)+ ν CH (20), ν CH (7) + ν CH (8)+ ν CH (9) | 37 | 1549.36cm-1 | | 1541.90 | 1487.94 | | 6.7557 | ν CH (7) + ν CH (8)+ ν CH (9), ν CH (13) + ν CH (14) |
|  | 38 | 1545cm-1 | 1548.44 | | 1494.25 | 4.0276 | ν CH (13) + ν CH (14), ν CH (16) + ν CH (17)+ ν CH (15) | 38 | 1555.75cm-1 | | 1546.37 | 1492.24 | | 11.9407 | ν CH (16) + ν CH (17)+ ν CH (15), ν CH (18) + ν CH (19)+ ν CH (20), ν CH (10) + ν CH (11), ν CH (13) + ν CH (14) |
|  | 39 | 1550cm-1 | 1548.87 | | 1494.66 | 13.1398 | ν CH (16) + ν CH (17)+ ν CH (15), ν CH (18) + ν CH (19)+ ν CH (20), ν CH (7) + ν CH (8)+ ν CH (9), ν CH (10), ν CH (11) + ν CH (12), ν CH (13) + ν CH (14) | 39 | 1562.13cm-1 | | 1549.42 | 1495.19 | | 15.2995 | ν CH (7) + ν CH (8)+ ν CH (9), ν CH (16) + ν CH (17)+ ν CH (15) |
|  | 40 | 1555cm-1 | 1554.11 | | 1499.71 | 14.8466 | ν CH (18) + ν CH (19)+ ν CH (20) | 40 | 1568.51cm-1 | | 1551.61 | 1497.30 | | 1.9953 | ν CH (16) + ν CH (17)+ ν CH (15) |
|  | 41 | 2970cm-1 | 2970.02 | | 2866.07 | 12.0545 | ν CH (10), ν CH (11) + ν CH (12) | 41 | 2953.62cm-1 | | 2959.24 | 2855.67 | | 10.5297 | ν CH (12), ν CH (11), ν CH (13) |
|  | 42 | 2985cm-1 | 2988.91 | | 2884.30 | 54.8477 | ν CH (10), ν CH (11) + ν CH (12) | 42 | 2985.54cm-1 | | 2986.11 | 2881.59 | | 17.7984 | ν CH (10) + ν CH (11), ν CH (13) + ν CH (14) |
|  | 43 | 3005cm-1 | 3004.03 | | 2898.89 | 46.6846 | ν CH (7) + ν CH (8)+ ν CH (9), ν CH (18) + ν CH (19)+ ν CH (20) | 43 | 2991.92cm-1 | | 2992.84 | 2888.09 | | 49.4652 | ν CH (12), ν CH (10) + ν CH (11), ν CH (13) + ν CH (14) |
|  | 44 | 3000cm-1 | 3004.59 | | 2899.43 | 60.0688 | ν CH (16) + ν CH (17)+ ν CH (15) | 44 | 3004.69cm-1 | | 3005.59 | 2900.39 | | 58.2195 | ν CH (16) + ν CH (17)+ ν CH (15), ν CH (18) + ν CH (19)+ ν CH (20) |
|  | 45 | 3010cm-1 | 3007.59 | | 2902.33 | 5.4896 | ν CH (10), ν CH (13) + ν CH (14) | 45 | 3011.07cm-1 | | 3009.79 | 2904.45 | | 32.8554 | ν CH (7) + ν CH (8)+ ν CH (9), ν CH (16) + ν CH (17)+ ν CH (15) |
|  | 46 | 3015cm-1 | 3010.27 | | 2904.91 | 6.7161 | ν CH (11) + ν CH (12), ν CH (13) + ν CH (14) | 46 | 3017.45cm-1 | | 3010.42 | 2905.05 | | 17.2611 | ν CH (16) + ν CH (17)+ ν CH (15), ν CH (7) + ν CH (8)+ ν CH (9) |
|  | 47 | 3015cm-1 | 3013.15 | | 2907.69 | 28.6090 | ν CH (13) + ν CH (14), ν CH (18) + ν CH (19)+ ν CH (20) | 47 | 3017.45cm-1 | | 3020.94 | 2915.21 | | 24.6306 | ν CH (12), ν CH (10) + ν CH (11) |
|  | 48 | 3040cm-1 | 3041.70 | | 2935.24 | 21.8028 | ν CH (11) + ν CH (12), ν CH (13) + ν CH (14) | 48 | 3036.60cm-1 | | 3039.72 | 2933.33 | | 24.4669 | ν CH (7) + ν CH (8)+ ν CH (9), ν CH (13) + ν CH (14) |
|  | 49 | 3070cm-1 | 3070.07 | | 2962.62 | 8.6758 | ν CH (17)+ ν CH (15) | 49 | 3068.52cm-1 | | 3069.62 | 2962.18 | | 16.7759 | ν CH (19)+ ν CH (20) |
|  | 50 | 3075cm-1 | 3073.02 | | 2965.47 | 60.9719 | ν CH (18) + ν CH (19)+ ν CH (20), ν CH (7) + ν CH (8)+ ν CH (9) | 50 | 3074.90cm-1 | | 3072.73 | 2965.19 | | 38.5568 | ν CH (17)+ ν CH (15), ν CH (7) + ν CH (9) |
|  | 51 | 3075cm-1 | 3075.13 | | 2967.50 | 52.7045 | ν CH (16) + ν CH (17)+ ν CH (15), ν CH (18) + ν CH (19)+ ν CH (20), ν CH (7) + ν CH (8)+ ν CH (9) | 51 | 3074.90cm-1 | | 3074.26 | 2966.66 | | 97.8584 | ν CH (17)+ ν CH (15), ν CH (7) + ν CH (9) |
|  | 52 | 3075cm-1 | 3075.94 | | 2968.29 | 48.2680 | ν CH (16) + ν CH (17)+ ν CH (15) | 52 | 3081.28cm-1 | | 3080.33 | 2972.51 | | 44.5936 | ν CH (16), ν CH (18), ν CH (8) |
|  | 53 | 3080cm-1 | 3076.58 | | 2968.90 | 57.0854 | ν CH (13) + ν CH (14), ν CH (17)+ ν CH (15) | 53 | 3087.67cm-1 | | 3084.54 | 2976.58 | | 92.9770 | ν CH (8)+ ν CH (9) |
|  | 54 | 3085cm-1 | 3080.81 | | 2972.98 | 125.0330 | ν CH (18) + ν CH (19)+ ν CH (20), ν CH (7) + ν CH (8)+ ν CH (9) | 54 | 3094.05cm-1 | | 3091.07 | 2982.89 | | 50.8116 | ν CH (18) + ν CH (19)+ ν CH (20), ν CH (16) + ν CH (17)+ ν CH (15) |

Table S10: Experimental and Theoretical IR Spectra for Cyclohexane with basic sets B3-LYP

| **DFT models** | **Target** | **Mode** | **Experimental IR** | **DFT** | | **IR** | **Vibrational mode** |
| --- | --- | --- | --- | --- | --- | --- | --- |
| **Scaled value** | **Unscaled value** |
| **B3LYP** | **Cyclohexane** | 1 | 225.75cm-1 | 229.12 | 221.10 | 0.0051 | ν CH (15)+ ν CH (16), ν CH (9) + ν CH (10) |
|  |  | 2 | 233.33cm-1 | 230.37 | 222.31 | 0.0051 | ν CH (11)+ ν CH (12), ν CH (13) + ν CH (14) |
|  |  | 3 | 377.27cm-1 | 375.09 | 361.96 | 0.0000 | ν CH (17)+ ν CH (18), ν CH (7) + ν CH (8) |
|  |  | 4 | 437.87cm-1 | 438.06 | 422.73 | 0.0000 | ν CH (15)+ ν CH (16), ν CH (9) + ν CH (10), ν CH (11)+ ν CH (12), ν CH (13) + ν CH (14), ν CH (17)+ ν CH (18), ν CH (7) + ν CH (8) |
|  |  | 5 | 445.54cm-1 | 440.40 | 424.99 | 0.0000 | ν CH (17)+ ν CH (8) |
|  |  | 6 | 528.78cm-1 | 531.45 | 512.85 | 0.6733 | ν CH (15)+ ν CH (16), ν CH (9) + ν CH (10), ν CH (11)+ ν CH (12), ν CH (13) + ν CH (14), ν CH (17)+ ν CH (18), ν CH (7) + ν CH (8) |
|  |  | 7 | 793.94cm-1 | 799.75 | 771.76 | 0.0000 | ν CH (14)+ ν CH (11), ν CH (18)+ ν CH (7) |
|  |  | 8 | 801.51cm-1 | 805.79 | 777.59 | 0.0000 | ν CH (17)+ ν CH (18), ν CH (7) + ν CH (8) |
|  |  | 9 | 809.09cm-1 | 807.46 | 779.20 | 0.0000 | ν CH (11)+ ν CH (12), ν CH (13) + ν CH (14) |
|  |  | 10 | 862.12cm-1 | 863.24 | 833.03 | 2.2739 | ν CH (15)+ ν CH (7), ν CH (18)+ ν CH (7) |
|  |  | 11 | 869.69cm-1 | 865.58 | 835.28 | 2.3229 | ν CH (15)+ ν CH (16), ν CH (13) + ν CH (14) |
|  |  | 12 | 937.88cm-1 | 936.43 | 903.65 | 2.6444 | ν CH (11)+ ν CH (12), ν CH (13) + ν CH (14) |
|  |  | 13 | 945.45cm-1 | 937.64 | 904.82 | 2.6071 | ν CH (15)+ ν CH (16), ν CH (9) + ν CH (10) |
|  |  | 14 | 1043.94cm-1 | 1048.70 | 1012.00 | 0.0000 | ν CH (9) + ν CH (10), ν CH (15)+ ν CH (16) |
|  |  | 15 | 1051.51cm-1 | 1050.56 | 1013.79 | 0.0000 | ν CH (11)+ ν CH (12) |
|  |  | 16 | 1059.09cm-1 | 1056.36 | 1019.38 | 2.5240 | ν CH (15)+ ν CH (16), ν CH (9) + ν CH (10), ν CH (11)+ ν CH (12), ν CH (13) + ν CH (14), ν CH (17)+ ν CH (18), ν CH (7) + ν CH (8) |
|  |  | 17 | 1096.97cm-1 | 1098.50 | 1060.05 | 0.0004 | ν CH (9) + ν CH (10), ν CH (15)+ ν CH (16) |
|  |  | 18 | 1104.54cm-1 | 1104.94 | 1066.27 | 0.0000 | ν CH (11)+ ν CH (12), ν CH (13) + ν CH (14) |
|  |  | 19 | 1150.04cm-1 | 1153.86 | 1113.47 | 0.0000 | ν CH (15)+ ν CH (10), ν CH (18)+ ν CH (7) |
|  |  | 20 | 1203.03cm-1 | 1201.40 | 1159.35 | 0.0000 | ν CH (15)+ ν CH (16), ν CH (9) + ν CH (10), ν CH (11)+ ν CH (12), ν CH (13) + ν CH (14), ν CH (17)+ ν CH (18), ν CH (7) + ν CH (8) |
|  |  | 21 | 1301.52cm-1 | 1306.33 | 1260.61 | 0.0000 | ν CH (15)+ ν CH (16), ν CH (9) + ν CH (10) |
|  |  | 22 | 1309.09cm-1 | 1307.48 | 1261.72 | 0.0000 | ν CH (17)+ ν CH (18), ν CH (7) + ν CH (8) |
|  |  | 23 | 1316.67cm-1 | 1311.59 | 1265.69 | 1.5262 | ν CH (13)+ ν CH (14), ν CH (7) + ν CH (8) |
|  |  | 24 | 1324.24cm-1 | 1312.04 | 1266.12 | 1.4988 | ν CH (16)+ ν CH (17), ν CH (12) + ν CH (9) |
|  |  | 25 | 1384.85cm-1 | 1383.24 | 1334.82 | 0.0000 | ν CH (16)+ ν CH (17), ν CH (12) + ν CH (9) |
|  |  | 26 | 1384.85cm-1 | 1387.37 | 1338.81 | 0.0000 | ν CH (13), ν CH (16), ν CH (13) , ν CH (9) |
|  |  | 27 | 1384.85cm-1 | 1387.99 | 1339.41 | 0.0000 | ν CH (16)+ ν CH (17), ν CH (12) + ν CH (9) |
|  |  | 28 | 1392.42cm-1 | 1392.22 | 1343.50 | 0.0000 | ν CH (16)+ ν CH (15), ν CH (17) + ν CH (18) |
|  |  | 29 | 1407.58cm-1 | 1408.98 | 1359.67 | 0.1857 | ν CH (9) + ν CH (10), ν CH (7) + ν CH (8) |
|  |  | 30 | 1415.15cm-1 | 1410.07 | 1360.72 | 0.1801 | ν CH (11)+ ν CH (12), ν CH (17) + ν CH (18) |
|  |  | 31 | 1521.21cm-1 | 1525.11 | 1471.73 | 7.9481 | ν CH (11)+ ν CH (12), ν CH (17) + ν CH (18) |
|  |  | 32 | 1525.79cm-1 | 1525.85 | 1472.44 | 7.7904 | ν CH (9)+ ν CH (10), ν CH (15) + ν CH (16) |
|  |  | 33 | 1525.79cm-1 | 1525.92 | 1472.51 | 0.1697 | ν CH (13), ν CH (8), ν CH (17) + ν CH (18) |
|  |  | 34 | 1525.79cm-1 | 1526.25 | 1472.84 | 0.0097 | ν CH (9)+ ν CH (10), ν CH (15) + ν CH (16) |
|  |  | 35 | 1536.36cm-1 | 1537.15 | 1483.35 | 17.5161 | ν CH (11)+ ν CH (12), ν CH (17) + ν CH (18) |
|  |  | 36 | 1543.94cm-1 | 1541.72 | 1487.76 | 0.0000 | ν CH (15)+ ν CH (16), ν CH (9) + ν CH (10), ν CH (11)+ ν CH (12), ν CH (13) + ν CH (14), ν CH (17)+ ν CH (18), ν CH (7) + ν CH (8) |
|  |  | 37 | 2983.34cm-1 | 2984.25 | 2879.80 | 29.4279 | ν CH (15)+ ν CH (16), ν CH (17)+ ν CH (18) |
|  |  | 38 | 2983.34cm-1 | 2984.33 | 2879.88 | 29.6368 | ν CH (17), ν CH (16), ν CH (12) , ν CH (9) |
|  |  | 39 | 2990.92cm-1 | 2986.45 | 2881.92 | 0.0525 | ν CH (17), ν CH (16), ν CH (12) , ν CH (8) |
|  |  | 40 | 2998.49cm-1 | 2989.27 | 2884.64 | 0.0232 | ν CH (13) + ν CH (14), ν CH (7)+ ν CH (8) |
|  |  | 41 | 2998.49cm-1 | 2989.36 | 2884.73 | 0.0856 | ν CH (15)+ ν CH (16), ν CH (17)+ ν CH (18) |
|  |  | 42 | 2998.49cm-1 | 2991.30 | 2886.61 | 79.9296 | ν CH (15)+ ν CH (16), ν CH (9) + ν CH (10), ν CH (11)+ ν CH (12), ν CH (13) + ν CH (14), ν CH (17)+ ν CH (18), ν CH (7) + ν CH (8) |
|  |  | 43 | 3036.37cm-1 | 3036.19 | 2929.93 | 144.4260 | ν CH (11), ν CH (18), ν CH (14) , ν CH (7) |
|  |  | 44 | 3036.37cm-1 | 3036.25 | 2929.98 | 144.1851 | ν CH (18), ν CH (10), ν CH (11) , ν CH (15) |
|  |  | 45 | 3036.37cm-1 | 3039.15 | 2932.78 | 0.2209 | ν CH (13) + ν CH (14), ν CH (7)+ ν CH (8) |
|  |  | 46 | 3036.37cm-1 | 3039.19 | 2932.82 | 0.0639 | ν CH (15)+ ν CH (16), ν CH (17)+ ν CH (18) |
|  |  | 47 | 3043.95cm-1 | 3043.50 | 2936.98 | 0.0577 | ν CH (7), ν CH (10), ν CH (11) , ν CH (14) |
|  |  | 48 | 3051.52cm-1 | 3050.77 | 2944.00 | 185.3040 | ν CH (15)+ ν CH (16), ν CH (9) + ν CH (10), ν CH (11)+ ν CH (12), ν CH (13) + ν CH (14), ν CH (17)+ ν CH (18), ν CH (7) + ν CH (8) |

Table S11: Experimental and Theoretical IR Spectra for Metformin with basic sets B3-LYP

| **DFT models** | **Target** | **Mode** | **Experimental IR** | **DFT** | | **IR** | **Vibrational mode** |
| --- | --- | --- | --- | --- | --- | --- | --- |
| **Scaled value** | **Unscaled value** |
| **B3LYP** | **Metformin** | 1 | -------------- | -285.153 | -294.58 | 0.6930 | ν CH (13)+ ν CH (14)+ ν CH (15) |
|  |  | 2 | -------------- | -149.682 | -154.63 | 1.1865 | ν CH (13)+ ν CH (14)+ ν CH (15), ν NH (19)+ ν NH (20) |
|  |  | 3 | -------------- | -126.721 | -130.91 | 13.7923 | ν CH (13)+ ν CH (14)+ ν CH (15), ν NH (19)+ ν NH (20), ), ν NH (17)+ ν NH (18) |
|  |  | 4 | -------------- | 142.0637 | 146.76 | 18.0510 | ν CH (10)+ ν CH (11)+ ν CH (12), ν CH (13)+ ν CH (14)+ ν CH (15), ν NH (19)+ ν NH (20), ), ν NH (17)+ ν NH (18) |
|  |  | 5 | -------------- | 162.2465 | 167.61 | 14.1244 | ν NH (19)+ ν NH (20), ), ν NH (17)+ ν NH (18) |
|  |  | 6 | -------------- | 238.9798 | 246.88 | 5.8714 | ν CH (10)+ ν CH (11)+ ν CH (12), ν CH (13)+ ν CH (14)+ ν CH (15) |
|  |  | 7 | -------------- | 264.9029 | 273.66 | 64.6432 | ν NH (17)+ ν NH (18) |
|  |  | 8 | -------------- | 342.4687 | 353.79 | 4.3096 | ν CH (10)+ ν CH (11)+ ν CH (12), ν CH (13)+ ν CH (14)+ ν CH (15), ν NH (19)+ ν NH (20), ), ν NH (17)+ ν NH (18) , ν NH (16) |
|  |  | 9 | -------------- | 357.0178 | 368.82 | 0.4269 | ν CH (10)+ ν CH (11)+ ν CH (12) |
|  |  | 10 | -------------- | 370.3374 | 382.58 | 4.3364 | ν CH (10)+ ν CH (11)+ ν CH (12), ν CH (13)+ ν CH (14)+ ν CH (15), ν NH (19)+ ν NH (20), ), ν NH (17)+ ν NH (18) , ν NH (16) |
|  |  | 11 | 446cm-1 | 449.5005 | 464.36 | 5.0760 | ν CH (13)+ ν CH (14)+ ν CH (15), ν NH (19)+ ν NH (20), ), ν NH (17)+ ν NH (18) , ν NH (16) |
|  |  | 12 | 464cm-1 | 479.2471 | 495.09 | 12.4948 | ν CH (10)+ ν CH (11)+ ν CH (12), ν CH (13)+ ν CH (14)+ ν CH (15), ν NH (19)+ ν NH (20), ν NH (17)+ ν NH (18) , ν NH (16) |
|  |  | 13 | 482cm-1 | 484.968 | 501.00 | 55.4203 | ν NH (19)+ ν NH (20) |
|  |  | 14 | 541cm-1 | 537.8982 | 555.68 | 174.0462 | ν NH (19)+ ν NH (20), ν NH (17)+ ν NH (18) |
|  |  | 15 | 571cm-1 | 544.8388 | 562.85 | 136.2142 | ν NH (17)+ ν NH (18) |
|  |  | 16 | -------------- | 658.5594 | 680.33 | 1.8176 | ν CH (10)+ ν CH (11)+ ν CH (12), ν CH (13)+ ν CH (14)+ ν CH (15), ν NH (19)+ ν NH (20), ν NH (17)+ ν NH (18) , ν NH (16) |
|  |  | 17 | -------------- | 702.526 | 725.75 | 157.8761 | ν NH (19)+ ν NH (20) |
|  |  | 18 | 736cm-1 | 741.6719 | 766.19 | 33.1857 | ν NH (19)+ ν NH (20), ν NH (17)+ ν NH (18) , ν NH (16) |
|  |  | 19 | -------------- | 850.9301 | 879.06 | 5.0320 | ν CH (10)+ ν CH (11)+ ν CH (12), ν CH (13)+ ν CH (14)+ ν CH (15), ν NH (19)+ ν NH (20), ν NH (17)+ ν NH (18) , ν NH (16) |
|  |  | 20 | -------------- | 873.1941 | 902.06 | 75.1772 | ν NH (16) |
|  |  | 21 | 936cm-1 | 943.6354 | 974.83 | 72.8698 | ν CH (10)+ ν CH (11)+ ν CH (12), ν CH (13)+ ν CH (14)+ ν CH (15), ν NH (19)+ ν NH (20), ν NH (17)+ ν NH (18) , ν NH (16) |
|  |  | 22 | -------------- | 979.2288 | 1011.60 | 363.4895 | ν NH (19)+ ν NH (20) |
|  |  | 23 | 1035cm-1 | 1045.43 | 1079.99 | 9.2672 | ν CH (13)+ ν CH (14)+ ν CH (15) |
|  |  | 24 | 1061cm-1 | 1064.606 | 1099.80 | 8.4480 | ν CH (10)+ ν CH (11)+ ν CH (12), ν CH (13)+ ν CH (14)+ ν CH (15) |
|  |  | 25 | 1080cm-1 | 1107.189 | 1143.79 | 27.1851 | ν CH (10)+ ν CH (11)+ ν CH (12), ν CH (13)+ ν CH (14)+ ν CH (15), ν NH (19)+ ν NH (20), ν NH (17)+ ν NH (18) , ν NH (16) |
|  |  | 26 | 1142cm-1 | 1127.41 | 1164.68 | 31.9529 | ν CH (10)+ ν CH (11)+ ν CH (12) |
|  |  | 27 | 1151cm-1 | 1165.085 | 1203.60 | 11.2345 | ν CH (10)+ ν CH (11)+ ν CH (12), ν CH (13)+ ν CH (14)+ ν CH (15), ν NH (19)+ ν NH (20) |
|  |  | 28 | 1160cm-1 | 1177.795 | 1216.73 | 45.6298 | ν CH (10)+ ν CH (11)+ ν CH (12) |
|  |  | 29 | 1250cm-1 | 1239.882 | 1280.87 | 177.2248 | ν CH (10)+ ν CH (11)+ ν CH (12), ν CH (13)+ ν CH (14)+ ν CH (15), ν NH (19)+ ν NH (20), ν NH (17)+ ν NH (18) , ν NH (16) |
|  |  | 30 | 1415.15cm-1 | 1298.078 | 1340.99 | 16.8031 | ν CH (10)+ ν CH (11)+ ν CH (12), ν CH (13)+ ν CH (14)+ ν CH (15) |
|  |  | 31 | 1521.21cm-1 | 1324.253 | 1324.253 | 86.2862 | ν NH (16) |
|  |  | 32 | 1400 cm-1 | 1452.319 | 1452.319 | 117.6729 | ν CH (13)+ ν CH (14), ν NH (16) |
|  |  | 33 | -------------- | 1466.414 | 1466.414 | 136.2723 | ν CH (10)+ ν CH (11)+ ν CH (12) |
|  |  | 34 | -------------- | 1469.956 | 1469.956 | 1.5276 | ), ν CH (13)+ ν CH (14)+ ν CH (15) |
|  |  | 35 | -------------- | 1481.514 | 1481.514 | 136.9371 | ν CH (10)+ ν CH (11)+ ν CH (12), ν CH (13)+ ν CH (14)+ ν CH (15) |
|  |  | 36 | 1450cm-1 | 1483.508 | 1483.508 | 12.1168 | ν CH (15), ν CH (10)+ ν CH (11)+ ν CH (12) |
|  |  | 37 | -------------- | 1508.463 | 1508.463 | 43.8222 | ν NH (19)+ ν NH (20), ν NH (17)+ ν NH (18) , ν NH (16) |
|  |  | 38 | 2983.34cm-1 | 1518.928 | 1518.928 | 102.8716 | ν CH (10)+ ν CH (11)+ ν CH (12) |
|  |  | 39 | 1500 cm-1 | 1529.382 | 1529.382 | 94.5653 | ν NH (19)+ ν NH (20), ν NH (17)+ ν NH (18) , ν NH (16) |
|  |  | 40 | 1580 cm-1 | 1565.934 | 1565.934 | 208.0458 | ν NH (17)+ ν NH (18), ν CH (10)+ ν CH (11)+ ν CH (12) |
|  |  | 41 | 1583 cm-1 | 1588.178 | 1640.68 | 226.5647 | ν NH (19)+ ν NH (20), ν NH (17)+ ν NH (18) , ν NH (16) |
|  |  | 42 | 1626cm-1 | 1619.067 | 1672.59 | 208.0481 | ν NH (17)+ ν NH (18) |
|  |  | 43 | -------------- | 1712.179 | 1768.78 | 387.7094 | ν NH (19)+ ν NH (20) |
|  |  | 44 | -------------- | 2700.081 | 2789.34 | 29.6746 | ν CH (13) |
|  |  | 45 | -------------- | 2718.986 | 2808.87 | 67.8320 | ν CH (10) |
|  |  | 46 | 2870cm-1 | 2808.042 | 2900.87 | 34.1376 | ν CH (10), ν CH (11), ν CH (12) |
|  |  | 47 | 2980cm-1 | 2945.363 | 3042.73 | 65.9364 | ν CH (11) |
|  |  | 48 | 3150cm-1 | 2976.871 | 3075.28 | 108.1589 | ν CH (15) |
|  |  | 49 | 3176cm-1 | 3174.692 | 3279.64 | 16.3558 | ν NH (16) |
|  |  | 50 | -------------- | 3217.274 | 3323.63 | 47.4412 | ν CH (14) |
|  |  | 51 | 3297cm-1 | 3241.638 | 3348.80 | 16.9552 | ν NH (19)+ ν NH (20) |
|  |  | 52 | 3392cm-1 | 3466.456 | 3581.05 | 245.8201 | ν NH (19) |
|  |  | 53 | -------------- | 3600.97 | 3720.01 | 20.0370 | ν NH (17)+ ν NH (18) |
|  |  | 54 | -------------- | 3747.312 | 3871.19 | 19.5492 | ν NH (17)+ ν NH (18) |
